# Supplementary material for: Genome-Wide Association Study Reveals a Genetic Mechanism of Salt Tolerance Germinability in Rice (Oryza sativa L.)
Source: Front Plant Sci. 2022 Jul 15;13:934515. doi: 10.3389/fpls.2022.934515 (PMC9335074; doi:10.3389/fpls.2022.934515)
Supplement: Supplementary Table 2 — Criteria for scoring the phenotype of each individual in the population. [file Table_2.xlsx]

## Sheet: Sheet1
	Table S2| Criteria for scoring the phenotype of each individual in the population
	Indice	Phenotypic value range	Scoring criteria
	RSL60	0.35-1.61	0<X≤0.4	0.4<X≤0.8	0.8<X≤1.2	1.2<X≤1.6	1.6<X≤2.0
			1	2	3	4	5
	RSL100	0.21-1.12	0<X≤0.24	0.24<X≤0.48	0.48<X≤0.72	0.72<X≤0.96	0.96<X≤1.2
			1	2	3	4	5
	RRL60	0.01-1.76	0<X≤0.4	0.4<X≤0.8	0.8<X≤1.2	1.2<X≤1.6	1.6<X≤2.0
			1	2	3	4	5
	RRL100	0.01-1.3	0<X≤0.3	0.3<X≤0.6	0.6<X≤0.9	0.9<X≤1.2	1.2<X≤1.5
			1	2	3	4	5
	RGE60	0.08-1.67	0<X≤0.4	0.4<X≤0.8	0.8<X≤1.2	1.2<X≤1.6	1.6<X≤2.0
			1	2	3	4	5
	RGE100	0-1.12	0<X≤0.24	0.24<X≤0.48	0.48<X≤0.72	0.72<X≤0.96	0.96<X≤1.2
			1	2	3	4	5
	RGI60	0.26-1.37	0<X≤0.3	0.3<X≤0.6	0.6<X≤0.9	0.9<X≤1.2	1.2<X≤1.5
			1	2	3	4	5
	RGI100	0.2-1.12	0<X≤0.24	0.24<X≤0.48	0.48<X≤0.72	0.72<X≤0.96	0.96<X≤1.2
			1	2	3	4	5
	RVI60	0.09-1.3	0<X≤0.3	0.3<X≤0.6	0.6<X≤0.9	0.9<X≤1.2	1.2<X≤1.5
			1	2	3	4	5
	RVI100	0.05-0.98	0<X≤0.2	0.2<X≤0.4	0.4<X≤0.6	0.6<X≤0.8	0.8<X≤1
			1	2	3	4	5
	RMGT60	0.95-1.18	1.14<X≤1.2	1.08<X≤1.14	1.02<X≤1.08	0.96<X≤1.02	0.90<X≤0.96
			1	2	3	4	5
	RMGT100	0.98-1.23	1.22<X≤1.3	1.14<X≤1.22	1.06<X≤1.14	0.98<X≤1.06	0.90<X≤0.98
			1	2	3	4	5
